# Supplementary material for: A review of carnivorous sponges (Porifera: Cladorhizidae) from the Boreal North Atlantic and Arctic
Source: Oxford University Press journal article supplement (doi:10.1093/zoolinnean/zlw022), 2017-07-06
Supplement: zlw022_suppl_Supplementary_Information.xlsx [file zlw022_suppl_Supplementary_Information.xlsx]

## Sheet: NA Cladorhizidae rev. spec.list
Species	Voucher / ID	Cruise	Vessel	Locality	Date	Station	Gear	Latitude	Longitude	Depth
Asbestopluma (Asbestopluma) bihamatifera		The Danish Ingolf Expedition	Ingolf		04.04.1895	St. 51.15		66°18'N	025°59'W	621 m
Asbestopluma (Asbestopluma) bihamatifera		The Danish Ingolf Expedition	Ingolf		20.05.1896	St. 59		65°00'N	011°16'W	584 m
Asbestopluma (Asbestopluma) bihamatifera		The Danish Ingolf Expedition	Ingolf		17.06.1896	St. 85		63°21'N	025°21'W	320 m
Asbestopluma (Asbestopluma) bihamatifera		The Danish Ingolf Expedition	Ingolf		29.07.1896	St. 125		68°08'N	016°02'W	1373 m
Asbestopluma (Asbestopluma) bihamatifera		The Danish Ingolf Expedition	Ingolf		29.07.1896	St. 126		67°19'N	015°52'W	552 m
Asbestopluma (Asbestopluma) bihamatifera		The Danish Ingolf Expedition	Ingolf		10.08.1896	St. 138		63°26'N	007°56'W	887 m
Asbestopluma (Asbestopluma) bihamatifera					1990-07-28	ME 507 I
Asbestopluma (Asbestopluma) bihamatifera		BIOFAR			1990-10-07	St. 773		62°33.2'N	003°17.3'W	705 m
Asbestopluma (Asbestopluma) bihamatifera	ZMBN 103447	IceAGE 2 2013 - POS 456	Poseidon	Faroe-Iceland Ridge	2013-07-31	880/3 EBS	Brenke Sledge	63°24.79'N	008°11.63'W	688 m
Asbestopluma (Asbestopluma) bihamatifera	75-11	LAR2012-003		Narwhal closure	2012-09-28	BB1_B_600m	Box core	67°59.45'N	059°22.89'W	571 m
Asbestopluma (Asbestopluma) furcata	ZMUC-DEM-281	The Danish Ingolf Expedition	Ingolf		10.07.1896	St. 101		66°23'N	012°05'W	1011 m
Asbestopluma (Asbestopluma) furcata	ZMUC-DEM-283	Michael Sars 1902	Michael Sars	East of Iceland	1902-03-16
Asbestopluma (Asbestopluma) furcata	ZMUC-DEM-282	Michael Sars 1902	Michael Sars		1902-06-26			62°53'N	004°14'E	848 m
Asbestopluma (Asbestopluma) furcata	NTNU 14723		Johan Ruud	Off Tromsø, Norway	1979-08-17	St. 1179-79		70°46'N	017°00'E	990 m
Asbestopluma (Asbestopluma) furcata					1990-07-28	ME 507 4
Asbestopluma (Asbestopluma) furcata			Polarstern		1994-09-19	Ark X-31-9-22		74°54.85'N	012°26.95'W	1415 m
Asbestopluma (Asbestopluma) furcata		BIOICE HM-1-99	Håkon Mosby		1999-08-25	BIOICE 3139		67°51.38'N	022°18.49'W	767 m
Asbestopluma (Asbestopluma) furcata		BIODEEP-06	G.O. Sars	Troll Wall	2006	ROV 16	ROV	71°17.86'N	005°46.29'W	557 m
Asbestopluma (Asbestopluma) furcata		H2DEEP-08	G.O. Sars	Schultz Massif top	2008-07-06	08-41-ROV 5	ROV	73°49.78'N	007°34.87'E	688 m
Asbestopluma (Asbestopluma) furcata	ZMBN 103453	H2DEEP-08	G.O. Sars	Schultz Massif slope	2008-07-06	08-43-ROV 6	ROV	73°47.51'N	007°49.41'E	1764 m
Asbestopluma (Asbestopluma) furcata	ZMBN 103454	H2DEEP-09	G.O. Sars	Btw. Loki and Schultz	2009-08-05	AGT-2	Agassiz trawl	73°35.19'N	007°44.08'E	2387 m
Asbestopluma (Asbestopluma) furcata		H2DEEP-11	G.O. Sars	Troll Wall	2011-06-16	ROV 5	ROV	71°17.84'N	005°46.41'W	520 m
Asbestopluma (Asbestopluma) furcata		H2DEEP-11	G.O. Sars	Troll Wall	2011-06-17	ROV 7	ROV	71°17.82'N	005°46.47'W	500 m
Asbestopluma (Asbestopluma) furcata		H2DEEP-11	G.O. Sars	Soria Moria	2011-06-17	ROV 8	ROV	71°15.68'N	005°48.85'W	645 m
Asbestopluma (Asbestopluma) furcata	ZMBN 103456	H2DEEP-11	G.O. Sars	Jan Mayen Ridge	2011-07-10	11C-35-ROV-06 (06-6)		68°30.562'N	008°14.33'W	1288 m
Asbestopluma (Asbestopluma) furcata	ZMBN 103457	H2DEEP-11	G.O. Sars	Jan Mayen Ridge	2011-07-14	11C-69-ROV-14 (14-2)		69°55'N	008°45'W	773-1097 m
Asbestopluma (Asbestopluma) furcata	ZMBN 103459	H2DEEP-11	G.O. Sars	Jan Mayen Ridge	2011-07-14	11C-69-ROV-14 (14-1)		69°55.00'N	008°44.99'W	773-1097 m
Asbestopluma (Asbestopluma) furcata	ZMBN 103455	H2DEEP-11	G.O. Sars	Jan Mayen Ridge	2011-07-15	11C-78-ROV-15 (15-4)		69°56.54'N	008°47.30'W	980-1120 m
Asbestopluma (Asbestopluma) furcata	ZMBN 103458	H2DEEP-11	G.O. Sars	Jan Mayen Ridge	2011-07-16	11C-86-ROV-17 (17-1)		71°15.70'N	005°50.58'W	719-772 m
Asbestopluma (Asbestopluma) furcata		H2DEEP-12	G.O. Sars	Troll Wall	2012-07-28	ROV 4	ROV	71°17.80'N	005°46.44'W	501 m
Asbestopluma (Asbestopluma) furcata		Hud2007-025	Hudson	The Gully Feeder Cyn 4 (Scotian Shelf)	2011-07-11	1058	Suction 5	43°58.08'N	059°01.10'W
Asbestopluma (Asbestopluma) furcata		Hud2007-025	Hudson	The Gully Feeder Cyn 4 (Scotian Shelf)	2011-07-11	1058	Biobox B sludge	43°58.08'N	059°01.10'W
Asbestopluma (Asbestopluma) furcata		Hud2007-025	Hudson	The Gully Feeder Cyn 4 (Scotian Shelf)	2011-07-11	1058	Suction 8	43°58.08'N	059°01.10'W
Asbestopluma (Asbestopluma) furcata		Hud2007-025	Hudson	The Gully Feeder Cyn 4 (Scotian Shelf)	2011-07-11	1058	Biobox Side A	43°58.08'N	059°01.10'W
Asbestopluma (Asbestopluma) furcata		Hud2007-025	Hudson	The Gully Feeder Cyn 4 (Scotian Shelf)	2011-07-11	1058	Biobox side A Ball of clay	43°58.08'N	059°01.10'W
Asbestopluma (Asbestopluma) furcata		Hud2007-025	Hudson	The Gully Feeder Cyn 4 (Scotian Shelf)	2011-07-11	1058	Biobox A sludge	43°58.08'N	059°01.10'W
Asbestopluma (Asbestopluma) pennatula	ZMBN 110	Norw.North-Atl.Exp.	Vøringen		16.06.1877	St. 96		66°08'N	003°00'E	1472 m
Asbestopluma (Asbestopluma) pennatula		Norw.North-Atl.Exp.	Vøringen
Asbestopluma (Asbestopluma) pennatula	ZMBN 132	A.M. Norman		Leirvik, Hardangerfjord	1879
Asbestopluma (Asbestopluma) pennatula	NTNU 14727			Stadsbygd, Trondheimsfjord		S.-Tr.F.
Asbestopluma (Asbestopluma) pennatula		The Danish Ingolf Expedition	Ingolf		16.05.1895	St. 6		63°43'N	014°34'W	167 m
Asbestopluma (Asbestopluma) pennatula		The Danish Ingolf Expedition	Ingolf		18.06.1895	St. 28		60°37'N	027°52'W	1504 m
Asbestopluma (Asbestopluma) pennatula		The Danish Ingolf Expedition	Ingolf		09.08.1895	St. 39		62°00'N	022°38'W	1629 m
Asbestopluma (Asbestopluma) pennatula		The Danish Ingolf Expedition	Ingolf		09.08.1895	St. 40		62°00'N	021°36'W	1591 m
Asbestopluma (Asbestopluma) pennatula		The Danish Ingolf Expedition	Ingolf		03.06.1896	St. 67		61°30'N	022°30'W	1836 m
Asbestopluma (Asbestopluma) pennatula		The Danish Ingolf Expedition	Ingolf		03.06.1896	St. 68		62°06'N	022°30'W	1587 m
Asbestopluma (Asbestopluma) pennatula		The Danish Ingolf Expedition	Ingolf		13.06.1896	St. 78		60°37'N	027°52'W	1504 m
Asbestopluma (Asbestopluma) pennatula		The Danish Ingolf Expedition	Ingolf		11.06.1896	St. 81		61°44'N	027°00'W	913 m
Asbestopluma (Asbestopluma) pennatula		The Danish Ingolf Expedition	Ingolf			St. 85		63°21'N	025°21'W	320 m
Asbestopluma (Asbestopluma) pennatula		The Danish Ingolf Expedition	Ingolf		26.06.1896	St. 94		65°56'N	036°19'W	384 m
Asbestopluma (Asbestopluma) pennatula		The Danish Ingolf Expedition	Ingolf		11.07.1896	St. 144		62°49'N	007°12'W	520 m
Asbestopluma (Asbestopluma) pennatula		The Danish Ingolf Expedition	Ingolf
Asbestopluma (Asbestopluma) pennatula		The Danish Ingolf Expedition	Ingolf
Asbestopluma (Asbestopluma) pennatula		Michael Sars 1900	Michael Sars	Between Iceland and Greenland	1900-08-03	St. 13		66°42'N	026°40'W	549 m
Asbestopluma (Asbestopluma) pennatula		Michael Sars 1910	Michael Sars	NW of Thomson Ridge	1910-08-09	St. 102		60°57'N	040°38'W	1098 m
Asbestopluma (Asbestopluma) pennatula			G.O. Sars	Tjernagel
Asbestopluma (Asbestopluma) pennatula			G.O. Sars	Selbjørnsfjord						256 m
Asbestopluma (Asbestopluma) pennatula			G.O. Sars	Hvidingsøy						183-329 m
Asbestopluma (Asbestopluma) pennatula		70/23-21-1 (P)				70/23-21-1
Asbestopluma (Asbestopluma) pennatula		BIOFAR			1987-07-18	St. 032		61°41.75'N	005°47.71'W	354 m
Asbestopluma (Asbestopluma) pennatula		BIOICE HM-1-93	Håkon Mosby		1993-05-03	BIOICE 2330		63°05'N	011°20'W	453 m
Asbestopluma (Asbestopluma) pennatula		Nucula brønn West						71°32.61'N	025°09.86'W
Asbestopluma (Asbestopluma) pennatula	P1-601	Caracole	L'Atalante	Porc. Bank, Prop. Mound	2001-08-06	St. P1, KGS 07b	Box corer	52°09'N	012°46'W	670 m
Asbestopluma (Asbestopluma) pennatula	P1-619	Caracole	L'Atalante	Porc. Bank, Prop. Mound	2001-08-06	St. P1, KGS 08a	Box corer	52°09'N	012°46'W	670 m
Asbestopluma (Asbestopluma) pennatula		H2DEEP-12	G.O. Sars	Troll Wall	2012-08-01	ROV 14 no. 7	ROV	71°17.91'N	005°46.36'W	465 m
Asbestopluma (Asbestopluma) pennatula		MAREANO 2013 205	Johan Hjort	Skjoldryggen	2013-06-22	R1114-581, GR	Grab	65°37.82'N	005°34.02'E	622 m
Asbestopluma (Asbestopluma) pennatula	ZMBN 103469	MAREANO 2013 110	G.O. Sars	Barent Sea, East	2013-08-08	R1174-633, GR	Grab	71°37.11'N	032°13.18'E	296 m
Asbestopluma (Asbestopluma) pennatula	ZMBN 103468	MAREANO 2013 110	G.O. Sars	Barent Sea, East	2013-08-08	R1174-634, GR	Grab	71°37.11'N	032°13.19'E	296 m
Asbestopluma (Asbestopluma) pennatula	ZMBN 103467	MAREANO 2013 110	G.O. Sars	Barent Sea, East	2013-08-09	R1186-464, BT		71°25.42'N	032°51.80'E	281 m
Asbestopluma (Asbestopluma) pennatula	117-942	Hud2013-029	Hudson	DS-South of Hatton Basin	2013-09-12	DS1_Q_Qout	Box Core	60°37.12'N	061°20.77'W	450 m
Asbestopluma (Asbestopluma) pennatula	96-92	LAR2012-003		Narwhal closure_L	2012-09-29	BB1_4_600m VV14	VanVeen	67°46.23'N	059°05.60'W	708 m
Asbestopluma (Asbestopluma) pennatula	26-1367	Hud2013-029	Hudson	Hatton Basin	2013-08-24	DS1_G_VV2	Van Veen	61°40.29'N	061°07.11'W	554 m
Asbestopluma (Asbestopluma) pennatula	42-78	Hud2013-029	Hudson	Hatton Basin	2013-08-25	DS1_I_VV4	Van Veen	61°20.56'N	061°07.33'W	554 m
Asbestopluma (Asbestopluma) pennatula	42-666	Hud2013-029	Hudson	Hatton Basin	2013-08-25	DS1_I_VV4	Van Veen	61°20.56'N	061°07.33'W	554 m
Asbestopluma (Asbestopluma) pennatula	43-104	Hud2013-029	Hudson	Hatton Basin	2013-08-25	DS1_I_VV5	Van Veen	61°20.64'N	061°07.30'W	556 m
Asbestopluma (Asbestopluma) pennatula	50-114	Hud2013-029	Hudson	Hatton Basin	2013-08-25	DS1_I_VV12	Van Veen	61°20.76'N	061°07.52'W	563 m
Asbestopluma (Asbestopluma) pennatula	105-1363	Hud2013-029	Hudson	DS-South of Hatton Basin	2013-09-12	DS1_Q_QIn	Box Core	60°37.17'N	061°20.92'W	451 m
Asbestopluma (Asbestopluma) pennatula	106-1220	Hud2013-029	Hudson	DS-South of Hatton Basin	2013-09-12	DS1_Q_QIn	Box Core	60°37.19'N	061°20.87'W	451 m
Asbestopluma (Asbestopluma) pennatula	107-1221	Hud2013-029	Hudson	DS-South of Hatton Basin	2013-09-12	DS1_Q_QIn	Box Core	60°37.20'N	061°20.96'W	451 m
Asbestopluma (Asbestopluma) pennatula	108-1277	Hud2013-029	Hudson	DS-South of Hatton Basin	2013-09-12	DS1_Q_QIn	Box Core	60°37.14'N	061°20.93'W	451 m
Asbestopluma (Asbestopluma) pennatula	110-1175	Hud2013-029	Hudson	DS-South of Hatton Basin	2013-09-12	DS1_Q	Box Core	60°36.97'N	061°20.67'W	443 m
Asbestopluma (Asbestopluma) pennatula	111-951	Hud2013-029	Hudson	DS-South of Hatton Basin	2013-09-12	DS1_Q_Qout	Box Core	60°37.81'N	061°21.61'W	456 m
Asbestopluma (Asbestopluma) pennatula	112-1036	Hud2013-029	Hudson	DS-South of Hatton Basin	2013-09-12	DS1_Q_Qout	Box Core	60°37.71'N	061°21.53'W	456 m
Asbestopluma (Asbestopluma) pennatula	113-1201	Hud2013-029	Hudson	DS-South of Hatton Basin	2013-09-12	DS1_Q_Qout	Box Core	60°37.77'N	061°21.52'W	460 m
Asbestopluma (Asbestopluma) pennatula	109-905	Hud2013-029	Hudson	DS-South of Hatton Basin	2013-09-12	DS1_Q	Box Core	60°37.04'N	061°20.86'W	452 m
Asbestopluma (Asbestopluma) ruetzleri	YPM 6826	Albatross 1885	Albatross	South of Cape Sable	13.07.1885	St. 2528	Beam trawl	41°47'N	065°37.5'W	1421 m
Asbestopluma (Asbestopluma) ruetzleri	USNM 32295	Bureau Land Mgmnt.		New York	1979-05-16	St. 35984	Dredge	40°15.6'N	068°05.5'W	780-1040 m
Asbestopluma (Asbestopluma) ruetzleri		NEREIDA 0509				DR04-012		48°28.47'N	044°07.37'W	1852 m
Asbestopluma (Asbestopluma) ruetzleri		NEREIDA 0509				DR07-21		48°15.38'N	044°01.85'W	1339 m
Asbestopluma (Asbestopluma) ruetzleri		Hud2007-025	Hudson	The Gully Feeder Cyn 4 (Scotian Shelf)	2011-07-11	1058	Biobox B sludge	43°58.08'N	059°01.10'W
Asbestopluma (Asbestopluma) ruetzleri		NEREIDA 0509			2009-06-14	BC32	Box core	47°05.10'N	043°36.43'W	811 m
Asbestopluma (Asbestopluma) ruetzleri		NEREIDA 0509			2009-06-15	BC34	Box core	47°07.26'N	043°27.29'W	1163 m
Asbestopluma (Asbestopluma) ruetzleri	12	NEREIDA 0509			2009-05-31	DR04	Rock dredge	48°28.47'N	044°07.37'W	1852 m
Asbestopluma (Asbestopluma) ruetzleri	21	NEREIDA 0509			2009-06-02	DR07	Rock dredge	48°15.38'N	044°01.85'W	1339 m
Asbestopluma (Asbestopluma) ruetzleri	141-360	LAR2012-003		Davis Strait	2012-10-09	DS1_S	Box core	61°09.08'N	060°46.00'W	1051 m
Asbestopluma (Asbestopluma) ruetzleri	145	LAR2012-003		Davis Strait	2012-10-09	DS1_S	Box core	61°08.86'N	060°45.30'W	1093 m
Asbestopluma (Asbestopluma) ruetzleri	46	Hud2013-021	Hudson			VV2	Van Veen	48°51.14'N	045°29.15'W	1564 m
Asbestopluma (Asbestopluma) ruetzleri	13-208	Hud2013-029	Hudson	Hatton Basin	2013-08-23	DS1_S_VV6	Van Veen	61°16.37'N	060°52.42'W	554 m
Asbestopluma (Asbestopluma) ruetzleri	14-802	Hud2013-029	Hudson	Hatton Basin	2013-08-24	DS1_T_VV1	Van Veen	61°32.28'N	060°29.29'W	1065 m
Asbestopluma (Asbestopluma) ruetzleri	18-143	Hud2013-029	Hudson	Hatton Basin	2013-08-24	DS1_T_VV5	Van Veen	61°32.34'N	060°29.34'W	1065 m
Asbestopluma (Asbestopluma) ruetzleri	42-666	Hud2013-029	Hudson	Hatton Basin	2013-08-25	DS1_I_VV4	Van Veen	61°20.56'N	061°07.33'W	554 m
Asbestopluma (Asbestopluma) ruetzleri	93-867	Hud2013-029	Hudson	Hatton Basin	2013-09-10	DS1_T_VV9	Van Veen	61°32.31'N	060°28.87'W	1057 m
Asbestopluma (Asbestopluma) ruetzleri	106-1220	Hud2013-029	Hudson	DS-South of Hatton Basin	2013-09-12	DS1_Q_QIn	Box Core	60°37.19'N	061°20.87'W	451 m
Chondrocladia (Chondrocladia) grandis	YPM 6987	Gloucester Fisheries	Cpt. Collins: Sch. Marion	Banquereau, Nova Scotia	1879			44°00'N	058°55'W	365-550 m
Chondrocladia (Chondrocladia) grandis	USNM 8462	Gloucester Fisheries	Sch. Wachusett	Western Bank	1879			43°17'N	060°58'W	329 m
Chondrocladia (Chondrocladia) grandis		Norw.North-Atl.Exp.	Vøringen		06.08.1876	St. 48		64°36'N	010°22'W	547 m
Chondrocladia (Chondrocladia) grandis		Norw.North-Atl.Exp.	Vøringen			St. 57
Chondrocladia (Chondrocladia) grandis	ZMBN 121	Norw.North-Atl.Exp.	Vøringen			St. 58
Chondrocladia (Chondrocladia) grandis		Norw.North-Atl.Exp.	Vøringen		21.06.1877	St. 137		67°24'N	008°58'E	827 m
Chondrocladia (Chondrocladia) grandis	YPM 556							44°12'N	058°56'W	421 m
Chondrocladia (Chondrocladia) grandis	YPM 6875	Gloucester Fisheries	Cpt. Anderson & crew	George's Bank	1878					274 m
Chondrocladia (Chondrocladia) grandis	YPM 6986	Gloucester Fisheries	Cpt. Gilpatrick: Sch. Polar Wave	South of Sable Island	1879			43°27'N	060°00'W	274 m
Chondrocladia (Chondrocladia) grandis	USNM 6074	Gloucester Fisheries	Sch. Addison Center	Cabot Strait, Banquereau	1879					320 m
Chondrocladia (Chondrocladia) grandis	USNM 8461	Gloucester Fisheries	Sch. H.A. Duncan	Western Bank	1879			43°17'N	060°58'W
Chondrocladia (Chondrocladia) grandis	YPM 6874	Gloucester Fisheries	Cpt. Murphy & crew	St. Peter's Bank	03.04.1880
Chondrocladia (Chondrocladia) grandis	YPM 7012	Gloucester Fisheries	Cpt. Jetchell: Sch. Otis P. Lord	Seal Isl. Ground, Nova Sc.	29.06.1880
Chondrocladia (Chondrocladia) grandis	YPM 8762	Gloucester Fisheries	Cpt. Crew: Sch. Isaac A. Chapman	St. Peter's Bank	04.08.1880			44°50'N	056°16'W	380 m
Chondrocladia (Chondrocladia) grandis	YPM 8704	Gloucester Fisheries	Cpt. Olsen: Sch. Epes Tarr	W edge of Grand Bank	20.09.1880
Chondrocladia (Chondrocladia) grandis	USNM 6073	Gloucester Fisheries	Sch. Alice M. Williams	Banquereau, Newfoundland	1880					183-274 m
Chondrocladia (Chondrocladia) grandis	USNM 6075	Gloucester Fisheries	Sch. Guy Cunningham	Cabot Strait, Banquereau	1880					183 m
Chondrocladia (Chondrocladia) grandis	USNM 5997	Gloucester Fisheries	Sch. Addison Center	Near Sable Island Bank				43°42'N	059°10'W	549 m
Chondrocladia (Chondrocladia) grandis	YPM 6533	Albatross 1885	Albatross	South of Cape Sable	13.07.1885	St. 2528	Beam trawl	41°47'N	065°37.5'W	1421 m
Chondrocladia (Chondrocladia) grandis		The Danish Ingolf Expedition	Ingolf		13.05.1896	St. 51.4		64°07'N	011°12'W	446 m
Chondrocladia (Chondrocladia) grandis		The Danish Ingolf Expedition	Ingolf		01.06.1896	St. 64		62°06'N	019°00'W	1960 m
Chondrocladia (Chondrocladia) grandis		The Danish Ingolf Expedition	Ingolf		10.07.1896	St. 101		66°23'N	012°05'W	1011 m
Chondrocladia (Chondrocladia) grandis		The Danish Ingolf Expedition	Ingolf		10.08.1896	St. 138		63°26'N	007°56'W	887 m
Chondrocladia (Chondrocladia) grandis		Michael Sars 1902	Michael Sars		1902-06-26	St. 34		62°53'N	004°17'W	823 m
Chondrocladia (Chondrocladia) grandis		Thor	Thor		1908-07-27	St. 80		66°20'N	012°10'W	960 m
Chondrocladia (Chondrocladia) grandis		Tjalfe	Tjalfe		1908-08-18			68°28'N	054°47'W	286-347 m
Chondrocladia (Chondrocladia) grandis		Godthaab			1928-08-01	St. 44b		75°35'N	065°41'W	490 m
Chondrocladia (Chondrocladia) grandis		Godthaab			1928-08-04			77°05.5'N	071°13'W	790 m
Chondrocladia (Chondrocladia) grandis		Godthaab			1928-08-06	St. 50a		77°28'N	068°46'W	875 m
Chondrocladia (Chondrocladia) grandis		Godthaab			1928-08-16			76°37.4'N	074°18'W	580 m
Chondrocladia (Chondrocladia) grandis		Godthaab			1928-09-13	St. 48a		67°48'N	060°46'W	1600 m
Chondrocladia (Chondrocladia) grandis		Sotra	Sotra		1929-06-07	St. 38		73°57'N	017°01'E	301 m
Chondrocladia (Chondrocladia) grandis	NTNU 15093		Johan Ruud	Norwegian Shelf	1981-08-31	St. 1230-81		68°08'N	010°10'E	860 m
Chondrocladia (Chondrocladia) grandis		BIOFAR			1990-05-05			62°53'N	006°04'W	700 m
Chondrocladia (Chondrocladia) grandis		BIOFAR			1990-05-15	St. 705		60°38.4'N	007°31'W	1038 m
Chondrocladia (Chondrocladia) grandis		BIOFAR			1990-09-29	St. 731		60°29.7'N	007°14.1'W	1042 m
Chondrocladia (Chondrocladia) grandis		BIOFAR			1990-10-03	St. 749		62°46.8'N	005°51.5'W	497 m
Chondrocladia (Chondrocladia) grandis		BIOFAR			1990-10-07	St. 772		62°33.0'N	003°21.1'W	703 m
Chondrocladia (Chondrocladia) grandis		BIOFAR			1990-10-07	St. 773		62°33.2'N	003°17.3'W	705 m
Chondrocladia (Chondrocladia) grandis		BIOICE HM-1-91	Håkon Mosby		1991-07-20	St. 2013		65°42.39'N	010°57.78'W	996 m
Chondrocladia (Chondrocladia) grandis		BIOICE HM-1-92	Håkon Mosby		1992-07-03	St. 2075		67°11.65'N	017°32.04'W	563 m
Chondrocladia (Chondrocladia) grandis		BIOICE HM-1-92	Håkon Mosby		1992-07-04	St. 2080		67°22.79'N	017°20.77'W	897 m
Chondrocladia (Chondrocladia) grandis		BIOICE HM-1-92	Håkon Mosby		1992-07-04	St. 2085		67°15.67'N	017°26.41'W	754 m
Chondrocladia (Chondrocladia) grandis		BIOICE HM-1-92	Håkon Mosby		1992-07-04	St. 2086		67°15.92'N	017°24.98'W	755 m
Chondrocladia (Chondrocladia) grandis		BIOICE HM-1-92	Håkon Mosby		1992-07-07	St. 2117		67°28.32'N	019°31.79'W	405 m
Chondrocladia (Chondrocladia) grandis		BIOICE HM-1-92	Håkon Mosby		1992-07-08	St. 2134		66°44.46'N	018°54.93'W	504 m
Chondrocladia (Chondrocladia) grandis		BIOICE HM-1-92	Håkon Mosby		1992-07-08	St. 2136		66°43.56'N	018°57.20'W	417 m
Chondrocladia (Chondrocladia) grandis		BIOICE HM-1-93	Håkon Mosby		1993-05-02	St. 2316		64°06'N	008°59'W	988 m
Chondrocladia (Chondrocladia) grandis		BIOICE HM-1-93	Håkon Mosby		1993-05-02	St. 2320		64°02'N	009°44'W	758 m
Chondrocladia (Chondrocladia) grandis		BIOICE HM-1-93	Håkon Mosby		1993-05-07	St. 2363		64°29'N	010°26'W	493 m
Chondrocladia (Chondrocladia) grandis		BIOICE HM-1-93	Håkon Mosby		1993-05-08	St. 2366		64°39'N	009°47'W	675 m
Chondrocladia (Chondrocladia) grandis		BIOICE HM-1-93	Håkon Mosby		1993-05-08	St. 2368		64°39'N	009°38'W	790 m
Chondrocladia (Chondrocladia) grandis		BIOICE HM-1-94	Håkon Mosby		1994-07-10	St. 2604		66°56.22'N	017°56.35'W	435 m
Chondrocladia (Chondrocladia) grandis		BIOICE HM-1-94	Håkon Mosby		1994-07-11	St. 2618		67°16.34'N	016°39.33'W	597 m
Chondrocladia (Chondrocladia) grandis		BIOICE HM-1-94	Håkon Mosby		1994-07-12	St. 2629		67°19.71'N	016°07.10'W	602 m
Chondrocladia (Chondrocladia) grandis		BIOICE HM-1-94	Håkon Mosby		1994-07-15	St. 2665		67°03.10'N	016°16.65'W	384 m
Chondrocladia (Chondrocladia) grandis	NTNU 15204			Off Ross Island	1996-09-13	St. 1190-96		81°26'N	020°06'E
Chondrocladia (Chondrocladia) grandis		BIOICE HM-1-99	Håkon Mosby		1999-08-25	St. 3144		67°30.18'N	024°10.10'W	1012 m
Chondrocladia (Chondrocladia) grandis		BIOICE HM-1-99	Håkon Mosby		1999-08-26	St. 3149		66°52.63'N	026°56.02'W	434 m
Chondrocladia (Chondrocladia) grandis		Paamiut 9		Off Sukkertoppen, W. Greenl.	2004-11-01	Pull 30		63°56'N	057°00'W	1014-1029 m
Chondrocladia (Chondrocladia) grandis		Paamiut 9		Off Sukkertoppen, W. Greenl.	2004-11-01	Pull 31		64°04'N	057°00'W	820-832 m
Chondrocladia (Chondrocladia) grandis	IEOFC0607_L19_15	Flemish Cap 2007	Vizconde de Eza	Flemish Cap, Newfoundland	2007-06-25	FC07 - 15		46°42.02'N	046°18.58'W	404 m
Chondrocladia (Chondrocladia) grandis	32	HUD2007	Hudson	The Gully Feeder Cyn 4 (Scotian Shelf)	2007-07-11	HUD2007-025-1058-032		43°58.08'N	059°01.10'W	632 m
Chondrocladia (Chondrocladia) grandis	41	PAA2010-009	Paamiut	Arctic	2010-10-22	PAA2010009041		75°06.01'N	075°19.66'W	491 m
Chondrocladia (Chondrocladia) grandis	42	PAA2010-009	Paamiut	Baffin Bay (Arctic)	2010-10-22	PAA2010009042		75°18.43'N	075°15.40'W	426 m
Chondrocladia (Chondrocladia) grandis	44	PAA2010-009	Paamiut	Arctic	2010-10-22	PAA2010009044		75°32.02'N	073°57.61'W	487 m
Chondrocladia (Chondrocladia) grandis	48	PAA2010-009	Paamiut	Arctic	2010-10-23	PAA2010009048		74°31.09'N	073°44.70'W	677 m
Chondrocladia (Chondrocladia) grandis	49	PAA2010-009	Paamiut	Arctic	2010-10-23	PAA2010009049		74°30.69'N	073°07.55'W	826 m
Chondrocladia (Chondrocladia) grandis	65	PAA2010-009	Paamiut	Arctic	2010-10-26	PAA2010009065		70°24.13'N	065°19.77'W	1425 m
Chondrocladia (Chondrocladia) grandis	98	PAA2010-009	Paamiut	Arctic	2010-10-30	PAA2010009098		67°40.16'N	061°43.60'W	1288 m
Chondrocladia (Chondrocladia) grandis	156	PAA2010-009	Paamiut	Arctic	2010-11-07	PAA2010009156		66°51.11'N	058°03.82'W	823 m
Chondrocladia (Chondrocladia) grandis	159	PAA2010-009	Paamiut	Baffin Bay (Arctic)	2010-11-08	PAA2010009159		66°42.85'N	058°31.47'W	749 m
Chondrocladia (Chondrocladia) grandis	154	PAA2011-117	Paamiut	Arctic	2011-10-14	PAA2011117154		65°09.08'N	058°35.46'W	477 m
Chondrocladia (Chondrocladia) grandis	6	PAA2012-007	Paamiut	Arctic	2012-09-29	PAA2012007006		72°23.94'N	073°16.54'W	533 m
Chondrocladia (Chondrocladia) grandis	25	PAA2012-007	Paamiut	Arctic	2012-10-02	PAA2012007025		73°40.28'N	077°01.34'W	993 m
Chondrocladia (Chondrocladia) grandis	31	PAA2012-007	Paamiut	Arctic	2012-10-04	PAA2012007031		75°34.56'N	079°44.04'W	532 m
Chondrocladia (Chondrocladia) grandis	38	PAA2012-007	Paamiut	Arctic	2012-10-05	PAA2012007038		74°26.78'N	078°26.09'W	663 m
Chondrocladia (Chondrocladia) grandis	42	PAA2012-007	Paamiut	Arctic	2012-10-06	PAA2012007042		73°57.18'N	076°29.10'W	877 m
Chondrocladia (Chondrocladia) grandis	44	PAA2012-007	Paamiut	Arctic	2012-10-06	PAA2012007044		73°33.96'N	075°36.53'W	908 m
Chondrocladia (Chondrocladia) grandis	46	PAA2012-007	Paamiut	Arctic	2012-10-06	PAA2012007046		73°38.51'N	074°39.37'W	967 m
Chondrocladia (Chondrocladia) grandis	54	PAA2012-007	Paamiut	Arctic	2012-10-07	PAA2012007054		74°05.09'N	074°31.77'W	785 m
Chondrocladia (Chondrocladia) grandis	65	PAA2012-007	Paamiut	Arctic	2012-10-09	PAA2012007065		74°38.88'N	073°38.25'W	757 m
Chondrocladia (Chondrocladia) grandis	96	PAA2012-007	Paamiut	Arctic	2012-10-13	PAA2012007096		71°38.48'N	070°04.44'W	689 m
Chondrocladia (Chondrocladia) grandis	97	PAA2012-007	Paamiut	Arctic	2012-10-13	PAA2012007097		71°37.78'N	069°22.57'W	1306 m
Chondrocladia (Chondrocladia) grandis	101	PAA2012-007	Paamiut	Arctic	2012-10-13	PAA2012007101		70°59.53'N	067°33.63'W	575 m
Chondrocladia (Chondrocladia) grandis	115	PAA2012-007	Paamiut	Arctic	2012-10-15	PAA2012007115		68°56.32'N	065°50.60'W	753 m
Chondrocladia (Chondrocladia) grandis	120	PAA2012-007	Paamiut	Arctic	2012-10-16	PAA2012007120		69°17.72'N	064°06.96'W	1442 m
Chondrocladia (Chondrocladia) grandis	130	PAA2012-007	Paamiut	Arctic	2012-10-18	PAA2012007130		67°35.37'N	063°31.20'W	575 m
Chondrocladia (Chondrocladia) grandis	147	PAA2012-007	Paamiut	Arctic	2012-10-20	PAA2012007147		67°27.62'N	060°36.10'W	1302 m
Chondrocladia (Chondrocladia) grandis	148	PAA2012-007	Paamiut	Arctic	2012-10-20	PAA2012007148		67°22.02'N	060°33.93'W	1079 m
Chondrocladia (Chondrocladia) grandis	169	PAA2012-007	Paamiut	Arctic	2012-10-23	PAA2012007169		68°00.35'N	059°51.73'W	1423 m
Chondrocladia (Chondrocladia) grandis	16	PAA2013-008	Paamiut	Arctic	2013-09-24	PAA2013008016		66°06.44'N	058°24.92'W	585 m
Chondrocladia (Chondrocladia) grandis	21	PAA2013-008	Paamiut	Arctic	2013-09-24	PAA2013008021		65°14.78'N	059°14.62'W	449 m
Chondrocladia (Chondrocladia) grandis		NRCan 67019			1967-06-27			43°45.80'	058°58.80'W	470 m
Chondrocladia (Chondrocladia) grandis		Hud2010-029	Hudson		2010-07-18	1339		48°12.19'N	043°56.83'W	1554 m
Chondrocladia (Chondrocladia) grandis		Hud2010-029	Hudson		2010-07-18	1339		48°12.04'N	043°56.94'W	1396 m
Chondrocladia (Chondrocladia) grandis		Hud2009-030	Hudson	Flemish Pass	2009-07-17	NAP09_02B		47°07.89'N	046°32.22'W	462 m
Chondrocladia (Chondrocladia) grandis		Hud2009-030	Hudson	Flemish Pass	2009-07-17	NAP09_02B		47°07.90'N	046°32.21'W	460 m
Chondrocladia (Chondrocladia) grandis		Hud2009-030	Hudson	Sackville Spur	2009-07-14	11		48°21.30'N	046°33.54'W	1411 m
Chondrocladia (Chondrocladia) grandis		Hud2009-030	Hudson	Sackville Spur	2009-07-14	11		48°21.57'N	046°33.67'W	1431 m
Chondrocladia (Chondrocladia) grandis		Hud2009-030	Hudson	Sackville Spur	2009-07-14	11		48°21.89'N	046°33.75'W	1465 m
Chondrocladia (Chondrocladia) grandis		Hud2009-030	Hudson	Sackville Spur	2009-07-14	12		48°22.12'N	046°31.73'W	1399 m
Chondrocladia (Chondrocladia) grandis		Hud2009-030	Hudson	Sackville Spur	2009-07-14	12		48°22.49'N	046°31.81'W	1452 m
Chondrocladia (Chondrocladia) grandis		Hud2009-030	Hudson	Sackville Spur	2009-07-14	12		48°22.51'N	046°31.83'W	1455 m
Chondrocladia (Chondrocladia) grandis		Hud2009-030	Hudson	Sackville Spur	2009-07-14	12		48°22.73'N	046°31.99'W	1507 m
Chondrocladia (Chondrocladia) grandis		Hud2009-030	Hudson	Sackville Spur	2009-07-14	12		48°23.38'N	046°32.27'W	1612 m
Chondrocladia (Chondrocladia) grandis		Hud2009-030	Hudson	Sackville Spur	2009-07-14	12		48°23.92'N	046°32.36'W	1715 m
Chondrocladia (Chondrocladia) grandis		Hud2009-030	Hudson	Sackville Spur	2009-07-14	12		48°23.94'N	046°32.35'W	1715 m
Chondrocladia (Chondrocladia) grandis		Hud2009-030	Hudson	Sackville Spur	2009-07-15	18		48°32.96'N	046°01.52'W	1421 m
Chondrocladia (Chondrocladia) grandis		Hud2009-030	Hudson	Sackville Spur	2009-07-16	24		48°48.41'N	045°31.42'W	1323 m
Chondrocladia (Chondrocladia) grandis		Lar2012-002			2009-10-01	CON-097		67°31.84'N	058°36.08'W	969 m
Chondrocladia (Chondrocladia) virgata	BMNH 82.7.28.97	Porcupine Exp. 1870	Porcupine	Off str. of Gibraltar	Summer 1870	31	Dredge?	35°56'N	007°06'W	872 m
Chondrocladia (Chondrocladia) virgata	ZMBN 25639	Michael Sars 1910	Michael Sars	Spanish Bay	1910-05-05	St. 23		35°32'N	007°07'W	1215 m
Chondrocladia (Chondrocladia) virgata	ZMBN 25640	Michael Sars 1910	Michael Sars	Off Cape Bojador (Can.Isl)	1910-05-10	St. 35		27°27'N	014°52'W	2603 m
Chondrocladia (Chondrocladia) virgata	ZMBN 25641	Michael Sars 1910	Michael Sars	Off Cape Bojador (Can.Isl)	1910-05-23	St. 41		28°08'N	013°35'W	1365 m
Chondrocladia (Chondrocladia) virgata		BALGIM				BALGIM CP 91 -I1		34°22.3'N	007°25.1'W	945 m
Chondrocladia (Chondrocladia) virgata		BALGIM				BALGIM CP 97-57		34°25.4'N	007°41.1'W	1498-1532 m
Cladorhiza abyssicola		Norw.North-Atl.Exp.	Vøringen		12.08.1878	St. 359		78°02'N	009°25'E	761 m
Cladorhiza abyssicola		Norw.North-Atl.Exp.	Vøringen		18.07.1876	St. 40		63°22'N	005°29'W	2222 m
Cladorhiza abyssicola		Norw.North-Atl.Exp.	Vøringen			Station unknown
Cladorhiza abyssicola		The Danish Ingolf Expedition	Ingolf		09.08.1895	St. 40		62°00'N	021°36'W	1591 m
Cladorhiza abyssicola		The Danish Ingolf Expedition	Ingolf		11.07.1895	St. 32		66°35'N	056°58'W	599 m
Cladorhiza abyssicola				Langenuen/Selbjørnsfjord	1902-03-10
Cladorhiza abyssicola		Michael Sars 1902	Michael Sars	Norskehavet	1902-06-29	St. 37		66°43’N	001°26’W	732 m
Cladorhiza abyssicola		Michael Sars 1902	Michael Sars		1902-08-10	St. 74		60°19'N	005°22'W	1130 m
Cladorhiza abyssicola		Michael Sars 1902	Michael Sars		1902-08-21	St. 86		62°59'N	010°37,5'W	460 m
Cladorhiza abyssicola		Armauer Hansen 1917	Armauer Hansen	Lavik, Sognefjorden	1917-05-11	St. 3				1870 m
Cladorhiza abyssicola		Dannevig 1952	Dannevig	Lindesnes/Lista	1952-07-10	St. 59		57°56'N	006°53'E	418-405 m
Cladorhiza abyssicola				Rute H30/31-33/34	12-13.03.1957	ZF/Z7? 46				678 m
Cladorhiza abyssicola		DEPRO96			1996-04-27	St. 16	Chalut	42°22.22'N	003°56.4'E	705-720 m
Cladorhiza abyssicola		B-9-00			2000-07-29	BIOICE 3177		60°44.91'N	023°42.72'W	1951 m
Cladorhiza abyssicola	T-875.2	Caracole	L'Atalante	Porcupine Bank	2001-08-02	St. T, KGS 05b	Box corer	51°25.00′N	011°45.00′W	875 m
Cladorhiza abyssicola	R2-702.4	Caracole	L'Atalante	Rockall Bank	2001-08-12	St. R2, KGS 16b	Box corer	55°32.00′N	015°40.00′W	702 m
Cladorhiza abyssicola	ZMAPOR 19500	BIOSYS/HERMES 2005		SE Rockall Bank	2005-08-26	BX35/01		55°26.66'N	016°04.53'W	781 m
Cladorhiza abyssicola	ZMAPOR 19732	BIOSYS/HERMES 2005		SE Rockall Bank	2005-07-09	BX114/01		55°26.57'N	016°05.85'W	644 m
Cladorhiza abyssicola	ZMBN 103470	Bioskag III	G.O. Sars	Skagerrak	2010-06-13	St. 13.06.10.02	ROV	58°25.5'N	009°38.7'E	700 m
Cladorhiza abyssicola						ME 578/3
Cladorhiza abyssicola		NEREIDA 0509			2009-06-15	BC34	Box core	47°07.26'N	043°27.29'W	1163 m
Cladorhiza abyssicola		Lar2012-002			2012-09-27	CON-053		67°59.76'N	059°17.86'W	454 m
Cladorhiza abyssicola		Lar2012-002			2012-09-29	CON-076		67°46.36'N	059°04.26'W	636 m
Cladorhiza abyssicola		Lar2012-002			2012-09-29	CON-076		67°46.24'N	059°04.79'W	664 m
Cladorhiza abyssicola		Lar2012-002			2012-09-29	CON-076		67°46.34'N	059°04.35'W	642 m
Cladorhiza abyssicola		Lar2012-002			2012-09-29	CON-076		67°46.47'N	059°03.82'W	609 m
Cladorhiza abyssicola		Lar2012-002			2012-09-29	CON-076		67°46.27'N	059°04.69'W	658 m
Cladorhiza abyssicola		Lar2012-002			2012-10-02	CON-116		67°22.36'N	057°55.00'W	644 m
Cladorhiza corticocancellata	BMNH 82.7.28.19	Porcupine Exp. 1869	Porcupine	West of Shetland	Summer 1869	St. 52		60°25'N	008°10'W	702 m
Cladorhiza corticocancellata	BMNH 82.7.28.67	Porcupine Exp. 1869	Porcupine	Betw. Scotland and Faroe	Summer 1869	St. 57		60°14'N	006°17'W	1156 m
Cladorhiza corticocancellata	BMNH 82.7.28.82	Porcupine Exp. 1869	Porcupine	Betw. Scotland and Faroe	Summer 1869	St. 57		60°14'N	006°17'W	1156 m
Cladorhiza corticocancellata		The Danish Ingolf Expedition	Ingolf		11.08.1896	St. 143		62°58'N	007°09'W	731 m
Cladorhiza corticocancellata		Michael Sars 1900	Michael Sars	East of Iceland	1900-07-28	St. 10		64°35'N	010°00'W	630 m
Cladorhiza corticocancellata		Michael Sars 1902	Michael Sars		1902-08-10	St. 74		60°19'N	005°22'W	1168 m
Cladorhiza corticocancellata		Thor 1903			1903-05-25	St. 51		66°02'N	011°05'W	1046 m
Cladorhiza corticocancellata		BIOICE B-9-93			1993-06-30	BIOICE 2388		63°30.10'N	022°03.70'W	171 m
Cladorhiza corticocancellata		BIOICE HM-1-93	Håkon Mosby		1993-07-12	BIOICE 2501		66°25.24'N	025°50.32'W	630 m
Cladorhiza corticocancellata	ZMBN 103471	GS08-155	G.O. Sars	Pockmark Tobic	2008-08-01	GS08-155-08ROV	ROV	64°40.86'N	005°15.77'E	720 m
Cladorhiza corticocancellata		H2DEEP-09	G.O. Sars	Btw. Loki and Schultz	2009-08-05	AGT-2	Agassiz trawl	73°35.19'N	007°44.08'E	2387 m
Cladorhiza corticocancellata		H2DEEP-11	G.O. Sars	Gallionella Garden	2011-06-17	ROV Dive 6	ROV	71°17.93'N	005°46.78'W	593 m
Cladorhiza gelida		Norw.North-Atl.Exp.	Vøringen		05.07.1876	St. 35		63°17'N	001°27'W	1977 m
Cladorhiza gelida	ZMUC-DEM-31	The Danish Ingolf Expedition	Ingolf		21-22.07.1896	St. 113		69°31'N	007°06'W	2465 m
Cladorhiza gelida	ZMUC-DEM-283	Michael Sars 1902	Michael Sars		1902-08-10			60°19'N	005°39'E	1169 m
Cladorhiza gelida		Norw.North-Atl.Exp.	Vøringen		29.06.1876	St. 31		63°10'N	005°00'E	763 m
Cladorhiza gelida	YPM 6574	Albatross 1884	Albatross	East of Cape Charles	10.09.1884	St. 2226	Beam trawl	37°00'N	071°54'W	3740 m
Cladorhiza gelida	ZMBN 25654	Michael Sars 1910	Michael Sars		09-10.08.1910	St. 102				1098 m
Cladorhiza gelida				Leirvik, Stord, Norway	1953-07-16	St. 64/53				300 m
Cladorhiza gelida		NORBI			1975-07-22	NORBI CP 05		66°45'N	002°01.9'W	3369 m
Cladorhiza gelida		NORBI			1975-08-02	NORBI CP 12		77°00.7'N	000°57.6'E	3193 m
Cladorhiza gelida		YMER 80			1980-07-19	St. MB 10		81°40'N	026°02.2'E	2400-2500 m
Cladorhiza gelida					1990-07-20	ME 427/3
Cladorhiza gelida					1990-09-26	ME 501
Cladorhiza gelida		BIOICE HM-1-92	Håkon Mosby		1992-07-03	BIOICE 2075		67°11.65'N	017°32.04'W	563 m
Cladorhiza gelida		BIOICE HM-1-93	Håkon Mosby		1993-07-15	BIOICE 2576		67°08.41'N	024°20.07'W	781 m
Cladorhiza gelida		BIOICE HM-1-94	Håkon Mosby		1994-07-12	BIOICE 2632		67°23.02'N	015°57.10'W	696 m
Cladorhiza gelida		Polarstern			1994-09-19	Ark X-31-9		74°53.39'N	012°25.19'W	1485 m
Cladorhiza gelida	ZMBN 103472	H2DEEP-08	G.O. Sars	Btw. Loki and Schultz	2008-07-02	08-10-ROV 1	ROV	73°34.02'N	008°03.42'E	2400 m
Cladorhiza gelida	ZMBN 103473	H2DEEP-11	G.O. Sars	Jan Mayen Ridge	2011-07-12	11C-49-ROV-09 (09-1)		70°24.17'N	007°12.78'W	1696 m
Cladorhiza gelida	ZMBN 103474	H2DEEP-11	G.O. Sars	Jan Mayen Ridge	2011-07-12	11C-49-ROV-09 (09-1)		70°24.17'N	007°12.78'W	1696 m
Cladorhiza gelida		H2DEEP-12	G.O. Sars	Troll Wall	2012-07-29	ROV 8 no. 1	ROV	71°17.89'N	005°46.35'W	550 m
Cladorhiza gelida		H2DEEP-12	G.O. Sars	Troll Wall	2012-07-29	ROV 8 no. 2	ROV	71°17.89'N	005°46.35'W	550 m
Cladorhiza gelida						84.03.15.2				1580 m
Cladorhiza gelida						87.06.12.1				1620 m
Cladorhiza gelida	FR 19 no 4_6a	Faranaut	L'Atalante	Mid-Atlantic Ridge	03-04.1992	St. 19	Nautile	15°20'N	045°W	3436 m
Cladorhiza iniquidentata		Michael Sars 1902			1902-08-29			63°13'N	006°32'W	1836 m
Cladorhiza kenchingtonae	CMNI 2016-0014	HUD2010-029	RV Hudson	Flemish Cap, Newfoundland	2010-07-13	Dive 1336	ROPOS ROV	46°19.03'N	044°33.46'W	2935 m
Cladorhiza oxeata	ZMUC-DEM-79	The Danish Ingolf Expedition	Ingolf		04.06.1895	St. 15		66°18'N	025°59'W	621 m
Cladorhiza oxeata	ZMUC-DEM-295	The Danish Ingolf Expedition	Ingolf		11.08.1896	St. 143		62°58'N	007°09'W	731 m
Cladorhiza oxeata	ZMUC-DEM-296	Wandel			19.09.1891			66°57'N	027°00'W	633 m
Cladorhiza oxeata		Ingegerd & Gladan Expedition	Ingegerd, Gladan	Baffin Bay	1870-1871					218 m
Cladorhiza oxeata		The Danish Ingolf Expedition	Ingolf		12.05.1896	St. 3		63°35'N	010°24'W	512 m
Cladorhiza oxeata		Michael Sars 1902	Michael Sars		1902-08-25			64°58'N	011°12'W	565 m
Cladorhiza oxeata	BMNH 82.7.28.43	Porcupine Exp. 1869	Porcupine	West of Shetland	Summer 1869	St. 52		60°25'N	008°10'W	702 m
Cladorhiza oxeata	ZMBN 36410	Michael Sars 1900	Michael Sars		1900	St. 10		64°53'N	010°0'W	630 m
Cladorhiza oxeata		Tjalfe	Tjalfe		1909-05-19			66°22'N	057°16'W	686 m
Cladorhiza oxeata		Tjalfe	Tjalfe		1908-08-18			66°28'N	054°47'W	375-475 m
Cladorhiza oxeata		Godthaab			1928-08-08	15a/47e		78°14'N	074°10'W	200 m
Cladorhiza oxeata		Degnbøl?		Kangerlussuaq	1932-08-25					175 m
Cladorhiza oxeata		Heimland			1933-08-18	St. 109/107/104 (?)		65°36'N	031°15'W	333 m
Cladorhiza oxeata		Norske fiskeriundersøkelser		Forlandet	1974-08-09	St. 203		78°20'N	010°34'E	100 m
Cladorhiza oxeata		BIOICE HM-1-92	Håkon Mosby		1992-07-04	BIOICE 2087		67°15.41'N	017°26.78'W	735 m
Cladorhiza oxeata		BIOICE HM-1-93	Håkon Mosby		1993-05-03	BIOICE 2322		63°55'N	010°04'W	627 m
Cladorhiza oxeata		BIOICE HM-1-93	Håkon Mosby		1993-05-03	BIOICE 2326		63°44'N	010°09'W	563 m
Cladorhiza oxeata		BIOICE HM-1-93	Håkon Mosby		1993-07-13	BIOICE 2516		66°36.85'N	025°22.69'W	680 m
Cladorhiza oxeata		BIOICE HM-1-93	Håkon Mosby		1993-07-15	BIOICE 2575		67°09.64'N	024°19.31'W	800 m
Cladorhiza oxeata	75	PAA2010-009	Paamiut	Arctic	2010-10-27	PAA2010009075		69°09.63'N	065°02.32'W	578 m
Cladorhiza oxeata	76	PAA2010-009	Paamiut	Arctic	2010-10-27	PAA2010009076		68°52.61'N	065°27.77'W	540 m
Cladorhiza oxeata	77	PAA2010-009	Paamiut	Arctic	2010-10-27	PAA2010009077		68°43.38'N	065°42.46'W	468 m
Cladorhiza oxeata	147	PAA2010-009	Paamiut	Arctic	2010-11-06	PAA2010009147		67°22.97'N	057°55.28'W	636 m
Cladorhiza oxeata	157	PAA2010-009	Paamiut	Arctic	2010-11-07	PAA2010009157		66°44.77'N	057°55.58'W	696 m
Cladorhiza oxeata	86	PAA2011-117	Paamiut	Outside NAFO Zone Hudson Strait	2011-10-06	PAA2011117086		59°53.46'N	068°32.42'W	171 m
Cladorhiza oxeata	112	PAA2011-117	Paamiut	Arctic	2011-10-09	PAA2011117112		61°41.67'N	063°50.60'W	488 m
Cladorhiza oxeata	114	PAA2011-117	Paamiut	Arctic	2011-10-09	PAA2011117114		61°54.54'N	063°38.23'W	514 m
Cladorhiza oxeata	115	PAA2011-117	Paamiut	Arctic	2011-10-09	PAA2011117115		61°59.82'N	063°03.81'W	448 m
Cladorhiza oxeata	30	PAA2012-007	Paamiut	Arctic	2012-10-04	PAA2012007030		74°35.48'N	079°22.18'W	530 m
Cladorhiza oxeata	31	PAA2012-007	Paamiut	Arctic	2012-10-04	PAA2012007031		75°34.56'N	079°44.04'W	532 m
Cladorhiza oxeata	32	PAA2012-007	Paamiut	Arctic	2012-10-04	PAA2012007032		75°31.21'N	078°22.48'W	490 m
Cladorhiza oxeata	39	PAA2012-007	Paamiut	Arctic	2012-10-05	PAA2012007039		74°25.29'N	077°37.59'W	663 m
Cladorhiza oxeata	96	PAA2012-007	Paamiut	Arctic	2012-10-13	PAA2012007096		71°38.48'N	070°04.44'W	689 m
Cladorhiza oxeata	104	PAA2012-007	Paamiut	Arctic	2012-10-14	PAA2012007104		70°40.60'N	066°48.62'W	678 m
Cladorhiza oxeata	105	PAA2012-007	Paamiut	Arctic	2012-10-14	PAA2012007105		70°34.08'N	066°25.89'W	895 m
Cladorhiza oxeata	106	PAA2012-007	Paamiut	Arctic	2012-10-14	PAA2012007106		70°26.58'N	065°39.57'W	1113 m
Cladorhiza oxeata	56	PAA2013-008	Paamiut	Arctic	2013-09-29	PAA2013008056		61°52.46'N	063°22.62'W	503 m
Cladorhiza oxeata	57	PAA2013-008	Paamiut	Arctic	2013-09-29	PAA2013008057		62°07.05'N	063°40.84'W	426 m
Cladorhiza oxeata	16	PAA2014-007	Paamiut	Arctic	2014-09-25	PAA2014007016		69°51.51'N	065°10.57'W	670 m
Cladorhiza oxeata	17	PAA2014-007	Paamiut	Arctic	2014-09-25	PAA2014007017		70°00.02'N	065°01.92'W	1097 m
Cladorhiza oxeata	18	PAA2014-007	Paamiut	Arctic	2014-09-25	PAA2014007018		70°14.10'N	065°03.03'W	1433 m
Cladorhiza oxeata	20	PAA2014-007	Paamiut	Arctic	2014-09-26	PAA2014007020		70°29.97'N	065°52.38'W	1141 m
Cladorhiza oxeata	142	PAA2014-007	Paamiut	Arctic	2014-10-16	PAA2014007142		63°01.66'N	060°40.38'W	418 m
Cladorhiza tenuisigma	ZMUC-DEM-161	The Danish Ingolf Expedition	Ingolf		24.07.1896	St. 117		69°13'N	008°23'W	1890 m
Cladorhiza tenuisigma	ZMUC-DEM-288	The Danish Ingolf Expedition	Ingolf		11.07.1896	St. 105		65°34'N	007°31'W	1435 m
Cladorhiza tenuisigma	NTNU 14724		Johan Ruud	Off Tromsø, Norway	1979-08-19	St. 1126-79		70°52'N	016°13'E	1677 m
Cladorhiza tenuisigma	NTNU 14725		Johan Ruud	Off Tromsø, Norway	1982-08-26	St. 1214-82		69°26'N	014°32'E	1750 m
Cladorhiza tenuisigma		Polarstern			1994-09-19	Ark X-31-9		74°53.39'N	012°25.19'W	1485 m
Cladorhiza tenuisigma		AB321/05		Svalbard	2005	St. 361
Cladorhiza tenuisigma	ZMBN 103475	H2DEEP-09	G.O. Sars	HM mud volcano rim	2009-08-03	AGT-1	Agassiz trawl	72°00.39'N	014°38.88'E	1302 m
Cladorhiza tenuisigma	ZMBN 103476	IceAGE 2 2013 - POS 456	Poseidon	Faroe Channel	2013-07-28	874/1 TD	Triangular dredge	61°32.75'N	004°22.09'W	894 m
Lycopodina comata	ZMUC-DEM-285	The Danish Ingolf Expedition	Ingolf		13.06.1896	St. 78		60°37'N	029°52'W	1504 m
Lycopodina cupressiformis	BMNH 82.7.28.43	Porcupine Exp. 1869	Porcupine	West of Shetland	Summer 1869	St. 52	Dredge?	60°25'N	008°10'W	702 m
Lycopodina cupressiformis		Wandel			19.08.1890			63°15'N	090°35'W	508 m
Lycopodina cupressiformis		The East Greenland Expedition	Hekla	East Greenland	26.07.1891			72°40'N	020°60'W	188 m
Lycopodina cupressiformis		The East Greenland Expedition	Hekla	East Greenland	27.07.1891	St. 31		72°27'N	019°56'W	226 m
Lycopodina cupressiformis		The East Greenland Expedition	Hekla	South end of Jarnesans land	03.08.1891					19-113 m
Lycopodina cupressiformis		The Danish Ingolf Expedition	Ingolf		12.05.1895	St. 81.3		63°35'N	010°24'W	512 m
Lycopodina cupressiformis				Tasiilaq, East Greenland	1902-08-22			65°35'N	039°00'W	55-91 m
Lycopodina cupressiformis		Michael Sars 1902			1902-08-28			63°14'N	009°46'W	475 m
Lycopodina cupressiformis		Tjalfe	Tjalfe		1908-08-18			66°28'N	054°47'W	175-350 m
Lycopodina cupressiformis		Godthaab			1928-08-15	St. 107		76°25'N	069°38'W
Lycopodina cupressiformis		Degnbøl			1932-08-20					175 m
Lycopodina cupressiformis		BIOFAR		Between Britain and Faroes	1990-09-29	St. 732		60°16.3'N	007°45.5'W	742 m
Lycopodina cupressiformis		BIODEEP-06	G.O. Sars	Gallionella Garden		ROV Dive 7	ROV	71°17.99'N	005°46.08'W	616 m
Lycopodina cupressiformis	ZMBN 103449	BIODEEP-06	G.O. Sars	Troll Wall	2006-06-16	ROV Dive 16	ROV	71°17.86'N	005°46.29'W	557 m
Lycopodina cupressiformis	ZMBN 103448	H2DEEP-08	G.O. Sars	Schultz Massif top	2008-07-06	08-41-ROV 5	ROV	73°49.78'N	007°34.87'E	688 m
Lycopodina cupressiformis	Set 153	PA2011-007				St. 419
Lycopodina cupressiformis		H2DEEP-11	G.O. Sars	Troll Wall	2011-06-17	ROV 7	ROV	71°17.82'N	005°46.47'W	500 m
Lycopodina cupressiformis		H2DEEP-11	G.O. Sars	Soria Moria	2011-06-17	ROV 8	ROV	71°15.68'N	005°48.85'W	645 m
Lycopodina cupressiformis	ZMBN 103450	H2DEEP-11	G.O. Sars	Jan Mayen Ridge	2011-07-12	11C-49-ROV-09 (09-1)		70°24.17'N	007°12.78'W	1696 m
Lycopodina cupressiformis	ZMBN 103451	H2DEEP-11	G.O. Sars	Jan Mayen Ridge	2011-07-09	11C-30-DR-05 (05-6)		68°16.61'N	008°49.14'W	764-1057 m
Lycopodina cupressiformis		H2DEEP-12	G.O. Sars	Troll Wall	2012-07-28	ROV 4	ROV	71°17.80'N	005°46.44'W	501 m
Lycopodina cupressiformis		H2DEEP-12	G.O. Sars	Troll Wall	2012-08-01	ROV 14 no. 13	ROV	71°17.91'N	005°46.36'W	465 m
Lycopodina cupressiformis	ZMBN 103452	IceAGE 2 2013 - POS 456	Poseidon	Faroe Channel	2013-07-29	876/4 TD	Triangular dredge	60°24.27'N	006°36.71'W	528 m
Lycopodina hydra	ZMUC-DEM-35	The Danish Ingolf Expedition	Ingolf	Jan Mayen Ridge	21-22.07.1896	St. 113		69°31'N	007°06'W	2465 m
Lycopodina hydra	ZMUC-DEM-284	The Danish Ingolf Expedition	Ingolf	Iceland Plateau	25.07.1896	St. 119		67°53'N	010°19'W	1902 m
Lycopodina infundibulum		The Danish Ingolf Expedition	Ingolf		11.08.1896	St. 143		62°58'N	007°09'W	731 m
Lycopodina infundibulum		The Danish Ingolf Expedition	Ingolf		29.07.1896	St. 126		67°19'N	015°52'W	552 m
Lycopodina infundibulum		The Danish Ingolf Expedition	Ingolf		23.07.1896	St. 116		70°05'N	008°26'W	699 m
Lycopodina infundibulum	DIA_DS 10	Diapisub	Le Nadir	Barabdos acc. prism	1993-01-02	St. 10	Nautile	10-12°N	058-060°W	1947 m
Lycopodina infundibulum	ZMBN 103460	GS08-155	G.O. Sars	Pockmark G11	2008-08-05	GS08-155-32ROV	ROV	64°39.83'N	005°17.38'E	734 m
Lycopodina infundibulum	ZMBN 103461	GS08-155	G.O. Sars	Pockmark G11	2008-08-05	GS08-155-32ROV	ROV	64°39.83'N	005°17.38'E	734 m
Lycopodina lycopodium	ZMBN 109	Norw.North-Atl.Exp.	Vøringen			Station unknown
Lycopodina lycopodium	NTNU 14720		Johan Ruud	Off Tromsø, Norway	1979-08-18	St. 1122-79		70°43'N	016°56'E	740 m
Lycopodina lycopodium	NTNU 15093		Johan Ruud	Off Lofoten, Norway	1981-08-31	St. 1230-81		68°08'N	010°10'E	860 m
Lycopodina lycopodium	T-1010.6	Caracole	L'Atalante	Porcupine Bank	2001-08-01	St. T, KGS 03	Box corer	51°25.00′N	011°45.00′W	1010 m
Lycopodina lycopodium	R2-617-884	Caracole	L'Atalante	Rockall Bank	2001-08-13	St. R2, ROV 132-10d	ROV	55°32.00′N	015°40.00′W	884 m
Lycopodina lycopodium		H2DEEP-08	G.O. Sars	Schultz Massif top	2008-07-06	08-41-ROV 5	ROV	73°49.78'N	007°34.87'E	688 m
Lycopodina lycopodium	ZMBN 103462	GS08-155	G.O. Sars	Pockmark G11	2008-08-04	GS08-155-25BC	Box corer	64°39.85'N	005°17.30'E	730 m
Lycopodina lycopodium		GS08-155	G.O. Sars	Pockmark G11	2008-08-05	GS08-155-32ROV	ROV	64°39.83'N	005°17.38'E	734 m
Lycopodina lycopodium	ZMBN 103465	MAREANO 2013 205	Johan Hjort	Skjoldryggen, Norway	2013-06-22	R1114-443, BT		65°37.63'N	005°35.23'E	611 m
Lycopodina lycopodium		Hud2007-025	Hudson			1064	Rock 3
Lycopodina lycopodium	108-1276	Hud2013-029	Hudson	DS-South of Hatton Basin	2013-09-12	DS1_Q_QIn	Box Core	60°37.14'N	061°20.93'W	451 m
Lycopodina tendali	NTNU 14723		Johan Ruud	Off Tromsø, Norway	1979-08-17	St. 1179-79		70°46'N	017°00'E	990 m
Lycopodina tendali		Polarstern		Eastern Greenland Shelf	1994-09-21	Ark X-31-16+C1		75°00.42'N	012°37.42'W	994 m
Lycopodina tendali		BIODEEP-06	G.O. Sars	Gallionella Garden	2006	ROV Dive 12	ROV	71°17.98'N	005°46.92'W	616 m
Lycopodina tendali		BIODEEP-06	G.O. Sars	Troll Wall	2006	ROV Dive 16	ROV	71°17.86'N	005°46.29'W	557 m
Lycopodina tendali		BIODEEP-07	G.O. Sars	Near Loki’s Castle	2007	ROV Dive 9	ROV	73°50.23'N	007°38.04'E	1262 m
Lycopodina tendali	ZMBN 103463	GS08-155	G.O. Sars	Pockmark Dodo	2008-08-05	GS08-155-33d		64°40.12'N	005°15.70'E	730 m
Lycopodina tendali		H2DEEP-09	G.O. Sars	Btw. Loki and Schultz	2009-08-05	AGT-2	Agassiz trawl	73°35.19'N	007°44.08'E	2387 m
Lycopodina tendali	ZMBN 103464	H2DEEP-11	G.O. Sars	Troll Wall	2011-06-17	ROV Dive 7	ROV	71°17.82'N	005°46.47'W	500 m
Lycopodina tendali		H2DEEP-12	G.O. Sars	Troll Wall	2012-07-28	ROV 4 no. 15	ROV	71°17.80'N	005°46.44'W	501 m
Lycopodina tendali		H2DEEP-12	G.O. Sars	Troll Wall	2012-08-01	ROV 14 no. 8	ROV	71°17.91'N	005°46.36'W	465 m
Lycopodina tendali	ZMBN 103466	MAREANO 2013 205	Johan Hjort	Skjoldryggen, Norway	2013-06-22	R1114-443, BT		65°37.63'N	005°35.23'E	611 m
Lycopodina minuta		H2DEEP-12	G.O. Sars	Troll Wall	2012-07-28	ROV 4 no. 16	ROV	71°17.80'N	005°46.44'W	501 m
Lycopodina minuta		H2DEEP-12	G.O. Sars	Troll Wall	2012-08-01	ROV 14 no. 12	ROV	71°17.91'N	005°46.36'W	465 m
Lycopodina novangliae	USNM 1234806	2B-79	Eastward	Lydonia Canyon (E US shelf)	1979-05-25	36023	Dredge	40°22.76'N	067°39.33'W	430-613 m
Lycopodina robusta		H2DEEP-09	G.O. Sars	Btw. Loki and Schultz	2009-08-05	AGT-2	Agassiz trawl	73°35.19'N	007°44.08'E	2387 m
